# Supplementary material for: Family with sequence similarity 13C (FAM13C) overexpression is an independent prognostic marker in prostate cancer
Source: PubMed Central journal article supplement (PMC5458224; doi:10.18632/oncotarget.16357), 2017-03-18
Supplement: oncotarget-08-31494-s001.pdf [file oncotarget-08-31494-s001.pdf]

## Family with sequence similarity 13C (FAM13C) overexpression is an independent prognostic marker in prostate cancer

### Supplementary Materials

**Supplementary Table 1: Association between FAM13C immunostaining results and prostate cancer phenotype in ERG fusion negative prostate cancers**

| Parameter                       | <i>n</i><br>evaluable | FAM13C (%) |      |          |        | <i>p</i><br>value |
|---------------------------------|-----------------------|------------|------|----------|--------|-------------------|
|                                 |                       | negative   | weak | moderate | strong |                   |
| All cancers                     | 4,750                 | 46.5       | 15.6 | 19.9     | 18.0   |                   |
| <b>Tumor stage</b>              |                       |            |      |          |        |                   |
| pT2                             | 3,156                 | 51.6       | 15.0 | 18.4     | 15.0   | < 0.0001          |
| pT3a                            | 967                   | 39.8       | 17.9 | 21.6     | 20.7   |                   |
| pT3b-4                          | 611                   | 30.6       | 14.7 | 25.2     | 29.5   |                   |
| <b>Gleason grade</b>            |                       |            |      |          |        |                   |
| ≤ 3 + 3                         | 986                   | 59.7       | 12.1 | 14.9     | 13.3   | < 0.0001          |
| 3 + 4                           | 2,675                 | 49.1       | 16.3 | 19.6     | 15.0   |                   |
| 4 + 3                           | 797                   | 28.9       | 16.9 | 27.1     | 27.1   |                   |
| ≥ 4 + 4                         | 271                   | 24.4       | 16.6 | 20.7     | 38.4   |                   |
| <b>Lymph node metastasis</b>    |                       |            |      |          |        |                   |
| N0                              | 2,785                 | 44.2       | 17.3 | 20.3     | 18.2   | < 0.0001          |
| N+                              | 278                   | 27.3       | 12.2 | 23.7     | 36.7   |                   |
| <b>Preop. PSA level (ng/ml)</b> |                       |            |      |          |        |                   |
| < 4                             | 492                   | 40.7       | 14.2 | 20.5     | 24.6   | 0.0001            |
| 4–10                            | 2,793                 | 48.7       | 15.1 | 19.7     | 16.5   |                   |
| 10–20                           | 1,043                 | 45.1       | 17.4 | 20.4     | 17.1   |                   |
| > 20                            | 382                   | 41.4       | 15.4 | 19.6     | 23.6   |                   |
| <b>Surgical margin</b>          |                       |            |      |          |        |                   |
| negative                        | 3,761                 | 47.8       | 15.3 | 19.6     | 17.2   | 0.0014            |
| positive                        | 902                   | 41.2       | 16.3 | 20.7     | 21.7   |                   |

**Supplementary Table 2: Association between FAM13C immunostaining results and prostate cancer phenotype in ERG fusion positive prostate cancers**

| Parameter                       | n<br>evaluable | FAM13C (%) |      |          |        | p<br>value |
|---------------------------------|----------------|------------|------|----------|--------|------------|
|                                 |                | negative   | weak | moderate | strong |            |
| <b>All cancers</b>              | 3,812          | 14.7       | 13.2 | 29.9     | 42.2   |            |
| <b>Tumor stage</b>              |                |            |      |          |        |            |
| pT2                             | 2,242          | 17.1       | 14.2 | 30.6     | 38.0   | < 0.0001   |
| pT3a                            | 1,037          | 12.7       | 12.6 | 28.4     | 46.3   |            |
| pT3b-4                          | 519            | 8.1        | 10.6 | 30.1     | 51.3   |            |
| <b>Gleason grade</b>            |                |            |      |          |        |            |
| ≤ 3 + 3                         | 793            | 18.9       | 12.6 | 32.8     | 35.7   | < 0.0001   |
| 3 + 4                           | 2,256          | 15.6       | 14.5 | 30.3     | 39.6   |            |
| 4 + 3                           | 598            | 7.4        | 10.5 | 25.9     | 56.2   |            |
| ≥ 4 + 4                         | 147            | 8.2        | 10.9 | 24.5     | 56.5   |            |
| <b>Lymph node metastasis</b>    |                |            |      |          |        |            |
| N0                              | 2,220          | 14.1       | 13.3 | 29.3     | 43.3   | 0.0656     |
| N+                              | 245            | 9.4        | 11.0 | 29.4     | 50.2   |            |
| <b>Preop. PSA level (ng/ml)</b> |                |            |      |          |        |            |
| < 4                             | 519            | 14.5       | 14.3 | 28.7     | 42.6   | 0.508      |
| 4–10                            | 2,301          | 14.9       | 13.7 | 30.1     | 41.3   |            |
| 10–20                           | 703            | 15.2       | 10.7 | 30.0     | 44.1   |            |
| > 20                            | 241            | 11.6       | 14.5 | 29.5     | 44.4   |            |
| <b>Surgical margin</b>          |                |            |      |          |        |            |
| negative                        | 2,972          | 15.4       | 13.8 | 29.8     | 40.9   | 0.0207     |
| positive                        | 771            | 12.1       | 11.8 | 30.7     | 45.4   |            |

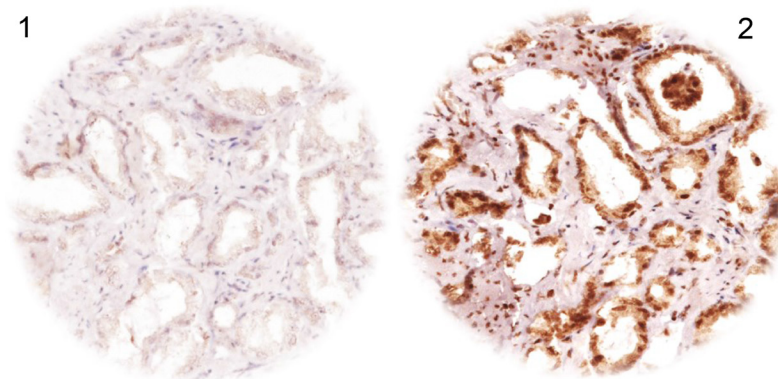

**Supplementary Figure 1: Representative immunostaining pictures of specificity control of the FAM13C antibody in prostate cancer. (1) primary FAM13C antibody combined with preabsorption control assay and (2) primary FAM13C antibody alone.**
